# Supplementary material for: The Establishment of Prostate-specific, SKP2 Humanized Mice by CRISPR Knock-in Method Reveals Neoplastic Initiation and Microenvironmental Reprogramming
Source: Research Square preprint supplement (doi:10.21203/rs.3.rs-8384571/v1), 2026-01-07
Supplement: Supplementary file 1 [file 3245c653593ca7a85ee70fb3.pdf]

## Interferon responses

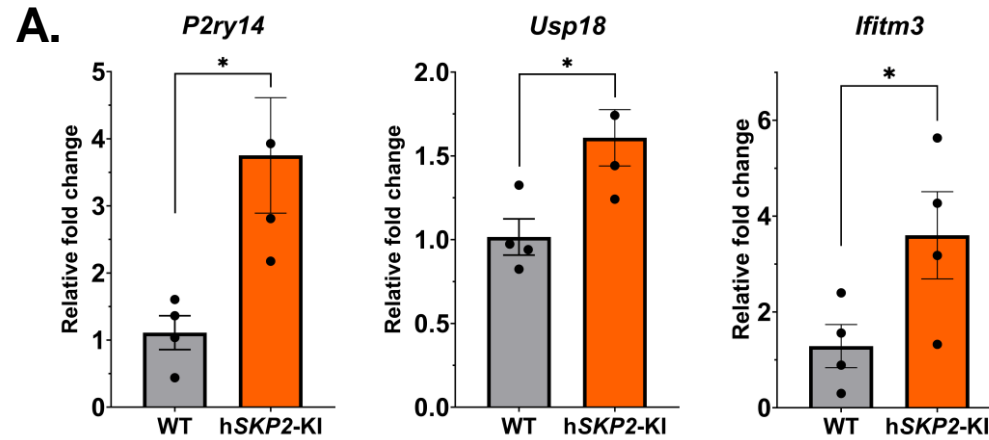

**Supplementary Figure 1.** Quantitative PCR analysis of the expression of interferon-related genes *P2ry14*, *Usp18* and *Ifitm3* in the prostate of hSKP2-KI mice. N = 4, \* $P < 0.05$ , \*\* $P < 0.01$ .

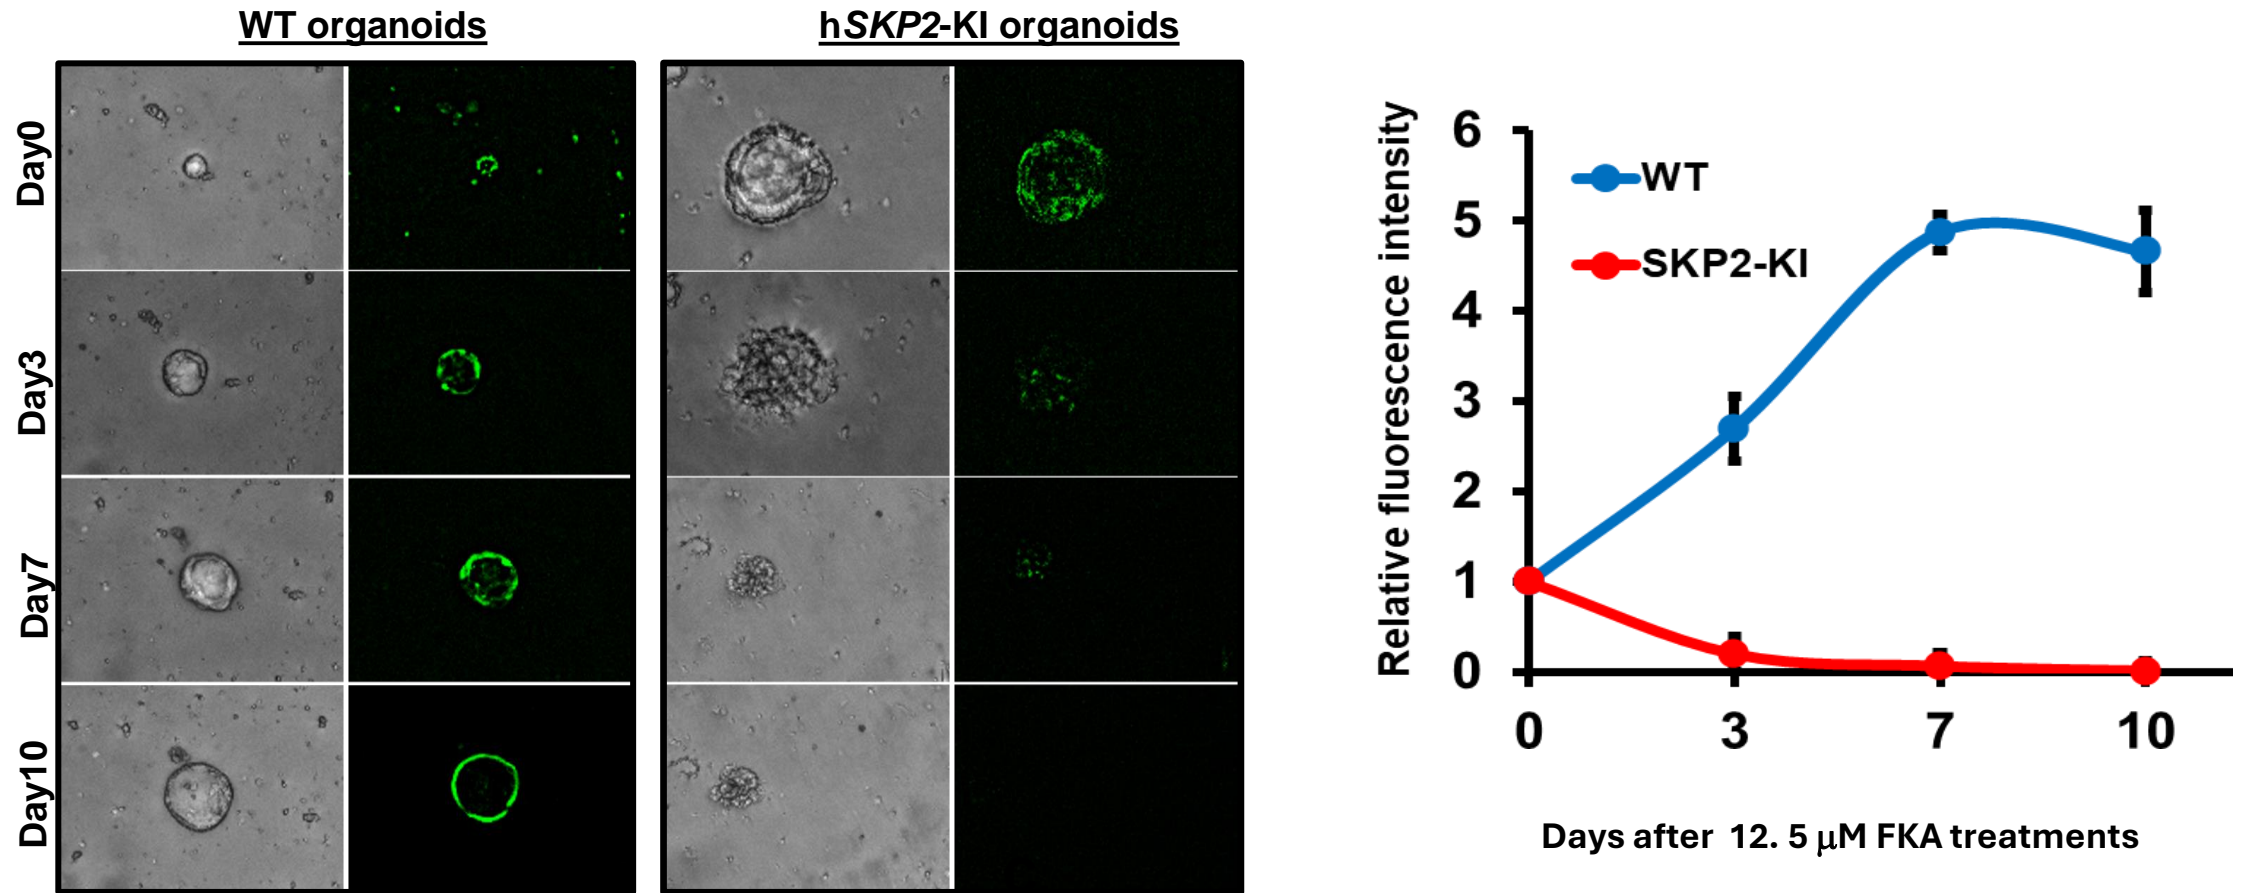

**Supplementary Figure 2. A.** WT and hSKP2-KI mouse prostate organoids were treated with FKA at 12.5 $\mu$ M for 10 days. Viabilities of these organoids were examined by adding a fluorescent dye CalAM 30 minutes before fluorescent intensity reading and imaging at indicated time points, Scale bar: 100  $\mu$ m. **B.** Relative fluorescent intensities of these organoids to their baseline levels at day 0 before treatments were calculated at indicated time points and presented as a line graph.

**Supplementary Table 1.** SKP2 IHC staining was quantified and summarized by diagnosis.

| Diagnosis              | Total number<br>(n) | positive cores<br>(n, %) | negative cores<br>(n, %) | Average of % SKP2 Positive Cells per positive core |                    |                 |
|------------------------|---------------------|--------------------------|--------------------------|----------------------------------------------------|--------------------|-----------------|
|                        |                     |                          |                          | Means                                              | Standard deviation | Standard errors |
| Normal prostate tissue | 10                  | 1 (10%)                  | 9 (90%)                  | 0.12                                               | n.a.               | n.a.            |
| Hyperplasia            | 49                  | 33 (68.6%)               | 16 (31.4%)               | 0.34                                               | 0.59               | 0.10            |
| Adjacent normal        | 5                   | 3 (60%)                  | 2 (40%)                  | 0.46                                               | 0.37               | 0.22            |
| PIN                    | 42                  | 41 (97.6%)               | 1 (2.4%)                 | 1.16                                               | 1.10               | 0.17            |
| Adenocarcinoma         | 138                 | 113 (81.9%)              | 25 (18.1%)               | 2.43                                               | 4.30               | 0.40            |
